# Supplementary material for: Systematic Review of Intervention Studies to Foster Sustainable Employability Core Components: Implications for Workplace Promotion
Source: MDPI journal article supplement (doi:10.3390/su14063300), 2022-03-11
Supplement: s1 [file s1]

## A Systematic Review of Intervention Studies to Foster Sustainable Employability Core Components: Implications for Workplace

### Promotion

**Table S2.** Data extraction of quantitative (QT) studies covering all SE core components in intervention content.

| Study reference, type, and quality                                | Study Population                                                                                            | Intervention content                                                                                                                                                                                            | SE Core Components in Intervention Content                                   | Outcome Measures                                                                                                              |                                                                                                                        |                                                    |                                                   | Effectiveness                                                                                                                                                                   |
|-------------------------------------------------------------------|-------------------------------------------------------------------------------------------------------------|-----------------------------------------------------------------------------------------------------------------------------------------------------------------------------------------------------------------|------------------------------------------------------------------------------|-------------------------------------------------------------------------------------------------------------------------------|------------------------------------------------------------------------------------------------------------------------|----------------------------------------------------|---------------------------------------------------|---------------------------------------------------------------------------------------------------------------------------------------------------------------------------------|
|                                                                   |                                                                                                             |                                                                                                                                                                                                                 |                                                                              | Health Outcome Measures                                                                                                       | Productivity Outcome Measures                                                                                          | Valuable Work Outcome Measures                     | Long-term Perspective                             |                                                                                                                                                                                 |
| Schelvis et al., 2017<br><br>QT<br><br>Moderate overall quality   | 356 Dutch educational workers                                                                               | A participatory approach, with two 12-months phases: 1) a need assessment phase and 2) an implementation phase.                                                                                                 | Health<br><br>Valuable work<br><br>Productivity<br><br>Long-term perspective | Need for recovery (self-rated evaluation)<br><br>Vitality (self-rated evaluation)<br><br>Work ability (self-rated evaluation) | Organizational efficacy (quality of services, self-rated evaluation)                                                   | Occupational self-efficacy (self-rated evaluation) | 12, 24 months (after baseline) follow-up          | No effect on Need for recovery, Vitality, Work ability and Occupational self-efficacy<br><br>Negative effect on Organizational efficacy                                         |
| Anderzén & Arnetz, 2005<br><br>QT<br><br>Moderate overall quality | 303 white-collar employees in 22 work units, representing 5 offices of the Swedish Internal Revenue Service | Based on a baseline assessment, a maximum of three specific enhancement areas for each work unit is identified. In each work unit, the managers and the workers make an action plan. All workers also took part | Health<br><br>Valuable work<br><br>Productivity<br><br>Long-term perspective | Employee well-being (self-rated evaluation)<br><br>Work-related exhaustion (self-rated evaluation)<br><br>Self-rated health   | Employeeeship (openness to and initiation of changes, self-rated evaluation)<br><br>Efficiency (self-rated evaluation) | Skills development (self-rated evaluation)         | 1 year (at the end of the intervention) follow-up | Positive effect on Employee well-being, Work-related exhaustion, Self-rated health, Sleep quality, serum lipids, testosterone, Employeeeship, Efficiency, Sickness absenteeism, |

| Study reference, type, and quality | Study Population | Intervention content                                                                                   | SE Core Components in Intervention Content | Outcome Measures                                                                                                                                     |                                                                        |                                |                       | Effectiveness                                                                         |
|------------------------------------|------------------|--------------------------------------------------------------------------------------------------------|--------------------------------------------|------------------------------------------------------------------------------------------------------------------------------------------------------|------------------------------------------------------------------------|--------------------------------|-----------------------|---------------------------------------------------------------------------------------|
|                                    |                  |                                                                                                        |                                            | Health Outcome Measures                                                                                                                              | Productivity Outcome Measures                                          | Valuable Work Outcome Measures | Long-term Perspective |                                                                                       |
|                                    |                  | in a general presentation about how psychosocial work factors and biologic stress markers are related. |                                            | Sleep quality (self-rated evaluation)<br><br>Lipids and stress-related hormones, serum lipids, cortisol, prolactin, and testosterone (blood samples) | Sickness absenteeism (company data)<br><br>Productivity (company data) |                                |                       | Productivity, and Skills development<br><br>Negative effect on cortisol and prolactin |
