# Supplementary material for: Systematic Review of Intervention Studies to Foster Sustainable Employability Core Components: Implications for Workplace Promotion
Source: MDPI journal article supplement (doi:10.3390/su14063300), 2022-03-11
Supplement: s1 [file s1]

Archive with 4 entries (4 files):
- sustainability-1552399-supplementary/Table S1.pdf
- sustainability-1552399-supplementary/Table S2.pdf
- sustainability-1552399-supplementary/Table S3.pdf
- sustainability-1552399-supplementary/Table S4.pdf
