# Supplementary material for: Systematic Review of Intervention Studies to Foster Sustainable Employability Core Components: Implications for Workplace Promotion
Source: MDPI journal article supplement (doi:10.3390/su14063300), 2022-03-11
Supplement: s1 [file s1 › sustainability-1552399-supplementary/Table S1.pdf]

# A Systematic Review of Intervention Studies to Foster Sustainable Employability Core

## Components: Implications for Workplace Promotion

**Table S1.** Full List of Search Terms.

|                                                                                                                                                                                                                                                                                                                                                                                                                                                                                                                                                                                                                                                                                                                                                                                                                                                                                                                                                                                                                                                                                                                                                                                                                                                                                                                                                                                                                                                                                                                                                                                                                                                                                                                                                                                       |
|---------------------------------------------------------------------------------------------------------------------------------------------------------------------------------------------------------------------------------------------------------------------------------------------------------------------------------------------------------------------------------------------------------------------------------------------------------------------------------------------------------------------------------------------------------------------------------------------------------------------------------------------------------------------------------------------------------------------------------------------------------------------------------------------------------------------------------------------------------------------------------------------------------------------------------------------------------------------------------------------------------------------------------------------------------------------------------------------------------------------------------------------------------------------------------------------------------------------------------------------------------------------------------------------------------------------------------------------------------------------------------------------------------------------------------------------------------------------------------------------------------------------------------------------------------------------------------------------------------------------------------------------------------------------------------------------------------------------------------------------------------------------------------------|
| <b>EconLit, PsycInfo</b>                                                                                                                                                                                                                                                                                                                                                                                                                                                                                                                                                                                                                                                                                                                                                                                                                                                                                                                                                                                                                                                                                                                                                                                                                                                                                                                                                                                                                                                                                                                                                                                                                                                                                                                                                              |
| ((ti(intervention OR training OR program) AND ab(manpower OR employ* OR personnel* OR staff OR worker* OR workplace* OR worksite* OR workforce OR "at work" OR "work site*" OR "work place*")) AND (health* OR wellbeing OR "well being" OR lifestyle OR "mental health" OR "physical health" OR stress OR productiv* OR "job performance" OR "occupational performance" OR "work performance" OR "employee performance" OR "job outcome*" OR "work outcome*" OR "occupational outcome*" OR "employee outcome*" OR employability OR employment OR "job motivation" OR competence* OR skill* OR knowledge OR capability OR capacity OR "job attitude*" OR "job affect*")) AND PEER(yes)) NOT ((su(army OR militar* OR "armed force*" OR student* OR child* OR adolescent* OR prison* OR freelance* OR patient* OR rural OR urban OR suicid* OR alcohol* OR "self employed" OR "self-employed" OR therap* OR treat* OR disabilit* OR "social service*" OR "public health intervention*" OR "pre-employment" OR "work placement" OR "work-placement")) OR ab(army OR militar* OR "armed force*" OR student* OR child* OR adolescent* OR prison* OR freelance* OR patient* OR rural OR urban OR suicid* OR alcohol* OR "self employed" OR "self-employed" OR treat* OR therap* OR disabilit* OR "social service*" OR "public health intervention*" OR "pre-employment" OR "work placement" OR "work-placement")) OR ti(army OR militar* OR "armed forces*" OR student* OR child* OR adolescent* OR prison* OR freelance* OR patient* OR rural OR urban OR suicid* OR alcohol* OR "self employed" OR "self-employed" OR treat* OR therap* OR disabilit* OR "social service*" OR "public health intervention*" OR "pre-employment" OR "work placement" OR "work-placement")) AND PEER(yes)) |
| <b>Web of Science</b>                                                                                                                                                                                                                                                                                                                                                                                                                                                                                                                                                                                                                                                                                                                                                                                                                                                                                                                                                                                                                                                                                                                                                                                                                                                                                                                                                                                                                                                                                                                                                                                                                                                                                                                                                                 |
| ((intervention OR training OR program)) AND <b>TOPIC:</b> ((manpower OR employ* OR personnel* OR staff OR worker* OR workplace* OR worksite* OR workforce OR "at work" OR "work site*" OR "work place*")) AND <b>TOPIC:</b> ((health* OR wellbeing OR "well being" OR lifestyle OR "mental health" OR "physical health" OR stress OR productiv* OR "job performance" OR "occupational performance" OR "work performance" OR "employee performance" OR "job outcome*" OR "work outcome*" OR "occupational outcome*" OR "employee outcome*" OR employability OR employment OR "job motivation" OR competence* OR skill* OR knowledge OR capability OR capacity OR "job attitude*" OR "job affect*"))                                                                                                                                                                                                                                                                                                                                                                                                                                                                                                                                                                                                                                                                                                                                                                                                                                                                                                                                                                                                                                                                                    |
