# Supplementary material for: Systematic Review of Intervention Studies to Foster Sustainable Employability Core Components: Implications for Workplace Promotion
Source: MDPI journal article supplement (doi:10.3390/su14063300), 2022-03-11
Supplement: s1 [file s1 › sustainability-1552399-supplementary/Table S3.pdf]

# A Systematic Review of Intervention Studies to Foster Sustainable Employability Core Components: Implications for Workplace

## Promotion

**Table S3.** Data extraction of qualitative (QL) and quantitative (QT) studies covering three SE core components in intervention content.

| Study reference, type, and quality                              | Study Population                                               | Intervention content                                                                                                                                                                                                                                                                                                            | SE Core Components in Intervention Content               | Outcome Measures                                                                  |                                                                                                                                                          |                                                                                              |                                                      | Effectiveness                                                                                                                                                                                          |
|-----------------------------------------------------------------|----------------------------------------------------------------|---------------------------------------------------------------------------------------------------------------------------------------------------------------------------------------------------------------------------------------------------------------------------------------------------------------------------------|----------------------------------------------------------|-----------------------------------------------------------------------------------|----------------------------------------------------------------------------------------------------------------------------------------------------------|----------------------------------------------------------------------------------------------|------------------------------------------------------|--------------------------------------------------------------------------------------------------------------------------------------------------------------------------------------------------------|
|                                                                 |                                                                |                                                                                                                                                                                                                                                                                                                                 |                                                          | Health Outcome Measures                                                           | Productivity Outcome Measures                                                                                                                            | Valuable Work Outcome Measures                                                               | Long-term Perspective                                |                                                                                                                                                                                                        |
| Hadgraft et al., 2017<br><br>QL<br><br>Moderate overall quality | 28 desk-based office employees from an Australian organization | A multicomponent intervention to reduce workplace sitting time by means of an individual sit-stand workstation, used by each worker for 12 months; health coaching (for the first 3 months); organizational strategies; and support by team leaders promoting an intervention message and the chosen organizational strategies. | Health<br><br>Valuable work<br><br>Long-term perspective | Health and well-being (interviews and focus groups)                               | Productivity (interviews and focus groups)<br><br>Work performance (interviews and focus groups)<br><br>Cost effectiveness (interviews and focus groups) | Awareness of health behavior (interviews and focus groups)                                   | 12 (at the end of intervention), 16 months follow-up | Positive effect on Health and well-being, Awareness of health behavior, Productivity (in the long-term), and Work performance, Cost effectiveness<br><br>No effect on Productivity (in the short-term) |
| Koolhaas et al., 2015<br><br>QT<br><br>Moderate overall quality | 236 Dutch aging workers                                        | A problem-solving based intervention consisting of three phases: 1) an assessment of work-related problems and needs, and personal career and development opportunities, with a corresponding evaluation of the openness to change                                                                                              | Health<br><br>Valuable work<br><br>Long term perspective | Perceived fatigue (self-rated evaluation)<br><br>Vitality (self-rated evaluation) | Productivity (self-rated evaluation)                                                                                                                     | Perceived work attitude (self-rated evaluation)<br><br>Self-efficacy (self-rated evaluation) | 3, 12 months (after baseline) follow-up              | Positive effect on Perceived work attitude, Self-efficacy, and Skills discretion<br><br>No effect on Perceived fatigue and Productivity                                                                |

| Study reference, type, and quality                             | Study Population                               | Intervention content                                                                                                                                                                                                                                                                                                                                                                                                         | SE Core Components in Intervention Content               | Outcome Measures                                                                                                                                                                |                                                               |                                                                                                      |                                    | Effectiveness                                                                                                                                                                                                                                       |
|----------------------------------------------------------------|------------------------------------------------|------------------------------------------------------------------------------------------------------------------------------------------------------------------------------------------------------------------------------------------------------------------------------------------------------------------------------------------------------------------------------------------------------------------------------|----------------------------------------------------------|---------------------------------------------------------------------------------------------------------------------------------------------------------------------------------|---------------------------------------------------------------|------------------------------------------------------------------------------------------------------|------------------------------------|-----------------------------------------------------------------------------------------------------------------------------------------------------------------------------------------------------------------------------------------------------|
|                                                                |                                                |                                                                                                                                                                                                                                                                                                                                                                                                                              |                                                          | Health Outcome Measures                                                                                                                                                         | Productivity Outcome Measures                                 | Valuable Work Outcome Measures                                                                       | Long-term Perspective              |                                                                                                                                                                                                                                                     |
|                                                                |                                                | of each aspect, by means of a booklet; 2) a dialogue between employee and supervisor to discuss solutions, through a brainstorming; and 3) an action plan and setting solutions for the following year.                                                                                                                                                                                                                      |                                                          | Work ability (self-rated evaluation)                                                                                                                                            |                                                               | Skills discretion (self-rated evaluation)                                                            |                                    | Negative effect on Vitality and Work ability                                                                                                                                                                                                        |
| Van Holland et al., 2017<br><br>QT<br><br>Weak overall quality | 305 workers of a Dutch meat processing company | Two phases: 1) a risk assessment to make the employee risk profile, testing physical and mental health by means of biometric measures, physical and mental functional work capacity, work ability, health, and lifestyle; and 2) a counseling session in which a consultant gives the worker feedback on his/her results obtained at the screening tests, and advises the employee whether or not to take following actions. | Health<br><br>Valuable work<br><br>Long-term perspective | Work ability (self-rated evaluation)<br><br>Subjective health (self-rated evaluation)<br><br>Health thermometer (self-rated evaluation)<br><br>Vitality (self-rated evaluation) | Self-reported productivity<br><br>Cost benefit (company data) | Meaning of work (self-rated evaluation)<br><br>Possibilities for development (self-rated evaluation) | 3 years (after baseline) follow-up | Positive effect on Meaning of work and Cost benefit<br><br>No effect on Subjective health, Health thermometer, Vitality, and Possibilities for development<br><br>Negative effect on Work ability, Sickness absence, and Self-reported productivity |
